# Supplementary material
Source: Elsevier journal article supplement (https://www.sciencedirect.com/science/article/pii/S253001641830171X)
Supplement: mmc1 [file S253001641830171X:mmc1.docx]

ANEXO 1

Relación de prevalencias extraídas de estudios realizados en España en las últimas décadas.

| **Autor** | **Año** | **Edad** | **Ámbito Geográfico** | **Prevalencia (%)** | **método** |
| --- | --- | --- | --- | --- | --- |
| Estudio DRECA, 1999 | 1991 | 5-59 | Andalucía | 4.8 | Exploración clínica* |
| Nadal *et al.,* 1991 | 1991 | >18 | León | 5.6 | Centinela |
| Calle Pascual *et al.*, 1993 | 1993 | todas | Ávila | 3.8 | Prescripciones** |
| Muñiz *et al.,* 1995 | 1995 | 40-69 | Galicia | 7.5 | Exploración clínica |
| Tamayo-Marco *et al.,* 1997 | 1997 | 10-74 | Aragón | 6.1 | Test de glucosa oral |
| Castell *et al.,* 2003 | 2000 | 30 a 89 | Cataluña | 10.3 | Encuesta telefónica |
| Rodríguez Panos *et al.,* 2000 | 2000 | >18 | Albacete | 6.7 | Exploración clínica |
| De Pablos *et al.,* 2001 | 2001 | >30 | Guía (Canarias) | 18.7 | Test de glucosa oral |
| Goday, 2002 | 2002 | 30-65 | España | 6,2 | Estudios basados en |
| Goday, 2002 | 2002 | 65-85 | España | 10 | Test de glucosa oral |
| Botas Cervero *et al.,* 2002 | 2002 | 30 a 75 | Asturias | 9.9 | Exploración clínica |
| Martínez Candela *et al.,* 2006 | 2001 | >30 | Yecla (Murcia) | 12.6 | Exploración clínica |
| Masiá *et al.*, 2004 | 2004 | 25 a 74 | Girona | 13 | Exploración clínica |
| Mato Mato *et al.,* 2005 | 2004 | >18 | Galicia | 7 | Exploración clínica |
| Varillas *et al.,* 2007 | 2005 | >30 | Canarias | 12.5 | Exploración clínica |
| Rosado Martín *et al.,* 2012 | 2006 | 31-70 | Madrid | 6.6 | Exploración clínica |
| Gil Montalbán *et al.,* 2010 | 2007 | 30-74 | Madrid | 8.1 | Exploración clínica |
| Reviriego Fernández et al., 2016 | 2007 | 29-44 | Cataluña | 2.4 | Exploración clínica |
| Giralt Muiña et al. 2011 | 2007 | >30 | Castilla La Mancha | 17,9 | Exploración clínica |
| López Suárez *et al.,* 2008 | 2008 | >50 | Sanlúcar (Cádiz) | 27.8 | Exploración clínica |
| Martínez Huedo, 2013 | 2009 |  | España | 6.6 | ENS |
| Martín Martínez *et al.,* 2013 | 2010 | >25 | Madrid | 10.8 | Historias clínicas |
| Martínez Abadía, y Arbués, 2012 | 2009 | 35 a 65 | Zaragoza | 2.9 | Exploración clínica |
| Soriguer *et al.,* 2012 | 2009-2010 | ≥ 18 | España | 13.8 | Exploración clínica |
| Jiménez Mejías et al., 2014 | 2001-2012 | todas | España | 7.1 | ENS |
|  |  |  |  |  |  |

*La exploración clínica hace referencia al diagnóstico realizado a partir bien de la obtención de la glucemia basal, bien de la sobrecarga oral de glucosa, o bien de los niveles de hemoglobina glicosilada (HbA1c).

**La información se obtiene a partir de las dosis de insulina prescritas al día.
